# Supplementary material for: Prospective Association of Physical Activity and Heart Failure Hospitalizations Among Black Adults With Normal Ejection Fraction: The Jackson Heart Study
Source: PubMed Central journal article supplement — J Am Heart Assoc. 2017 Sep 7;6(9):e006107. doi: 10.1161/JAHA.117.006107 (PMC5634276; doi:10.1161/jaha.117.006107), 2017-09-07
Supplement: JAH3-6-e006107-s001.pdf [file JAH3-6-e006107-s001.pdf]

# **SUPPLEMENTAL MATERIAL**

**Table S1.** Characteristics of the excluded cohort at baseline visit by physical activity, 2000-2004

| Variable                                 | AHA Physical Activity Categories |                            |                                       |                             | P-value |
|------------------------------------------|----------------------------------|----------------------------|---------------------------------------|-----------------------------|---------|
|                                          | Overall<br>(n = 1235)            | Poor Health *<br>(n = 687) | Intermediate<br>Health †<br>(n = 341) | Ideal Health ‡<br>(n = 202) |         |
| Age (years)                              | 56.51 ± 14.10                    | 59.49 ± 13.40              | 54.01 ± 14.24                         | 50.63 ± 13.58               | <0.001  |
| Sex                                      |                                  |                            |                                       |                             | 0.020   |
| Female                                   | 746 (60.40)                      | 414 (60.26)                | 222 (65.10)                           | 107 (52.97)                 |         |
| Male                                     | 489 (39.60)                      | 273 (39.74)                | 119 (34.90)                           | 95 (47.03)                  |         |
| Body Mass Index (kg/m <sup>2</sup> )     | 31.97 ± 7.82                     | 31.93 ± 7.61               | 32.14 ± 8.02                          | 31.85 ± 8.22                | 0.890   |
| Smoking Status                           |                                  |                            |                                       |                             | 0.453   |
| Never                                    | 753 (60.97)                      | 412 (59.97)                | 209 (61.29)                           | 132 (65.35)                 |         |
| Current                                  | 220 (17.82)                      | 134 (19.51)                | 56 (16.42)                            | 30 (14.85)                  |         |
| Former                                   | 262 (21.21)                      | 141 (20.52)                | 76 (22.29)                            | 40 (19.80)                  |         |
| Hypertension                             | 837 (67.99)                      | 508 (74.27)                | 218 (64.12)                           | 109 (53.96)                 | <0.001  |
| Diabetes Mellitus                        | 347 (29.56)                      | 221 (33.79)                | 87 (26.85)                            | 38 (19.90)                  | <0.001  |
| Chronic Obstructive Pulmonary<br>Disease | 119 (13.08)                      | 70 (14.06)                 | 31 (12.35)                            | 18 (11.46)                  | 0.641   |
| Coronary Heart Disease                   | 210 (17.00)                      | 139 (20.23)                | 50 (14.66)                            | 21 (10.40)                  | 0.002   |
| Atrial Fibrillation                      | 11 (0.90)                        | 7 (1.04)                   | 2 (0.59)                              | 2 (1.00)                    | 0.771   |
| Chronic Kidney Disease                   | 142 (12.41)                      | 99 (15.71)                 | 29 (9.12)                             | 13 (6.81)                   | 0.001   |
| Incident Coronary Heart<br>Disease§      | 75 (7.40)                        | 44 (8.15)                  | 23 (7.99)                             | 8 (4.42)                    | 0.233   |

Data are presented as mean ± standard deviation or n (%).

Physical activity is based on the American Heart Association Life's Simple 7. \* Poor health is defined as 0 minutes of moderate and vigorous physical activity. † Intermediate health is defined as 1-149 minutes of moderate physical activity, 1-75 minutes of vigorous activity, or 1-149 minutes of combined moderate and vigorous physical activity. ‡ Ideal health is defined as ≥ 150 minutes of moderate physical activity, ≥ 75 minutes of vigorous physical activity, or ≥ 150 minutes of combined moderate and vigorous physical activity.

§ Incident coronary heart disease excluding missing values (n = 3,862)

**Table S2.** Unadjusted and adjusted hazard ratio of incident heart failure hospitalization

| Models                                                                                                                                                           | Sub-HR (95% CI)  | P <sub>trend</sub> |
|------------------------------------------------------------------------------------------------------------------------------------------------------------------|------------------|--------------------|
| Physical Activity Crude                                                                                                                                          |                  | <0.001             |
| Poor Health                                                                                                                                                      | 1.00 (Referent)  |                    |
| Intermediate Health                                                                                                                                              | 0.44 (0.26-0.74) |                    |
| Ideal Health                                                                                                                                                     | 0.23 (0.10-0.54) |                    |
| Physical Activity + Age + Sex                                                                                                                                    |                  | 0.008              |
| Poor Health                                                                                                                                                      | 1.00 (Referent)  |                    |
| Intermediate Health                                                                                                                                              | 0.57 (0.34-0.96) |                    |
| Ideal Health                                                                                                                                                     | 0.32 (0.14-0.75) |                    |
| Physical Activity + Age + Sex + BMI* + Smoking status + Hypertension + COPD <sup>†</sup> + Atrial fibrillation + Diabetes + CKD <sup>‡</sup> + iCHD <sup>§</sup> |                  | 0.042              |
| Poor Health                                                                                                                                                      | 1.00 (Referent)  |                    |
| Intermediate Health                                                                                                                                              | 0.69 (0.41-1.15) |                    |
| Ideal Health                                                                                                                                                     | 0.42 (0.19-0.97) |                    |

across physical activity levels accounting for the competing risk of death.

\* Body mass index

† Chronic obstructive pulmonary disease

‡ Chronic kidney disease

§ Incident coronary heart disease

**Table S3.** Unadjusted and adjusted hazard ratio of incident heart failure hospitalization across physical activity levels with full model adjusting for incident coronary heart disease or excluding participants with incident coronary heart disease.

| Models                   | HR (95% CI)      | P <sub>trend</sub> |
|--------------------------|------------------|--------------------|
| Model adjusting for iCHD |                  | 0.003              |
| Poor Health              | 1.00 (Referent)  |                    |
| Intermediate Health      | 0.82 (0.55-1.23) |                    |
| Ideal Health             | 0.29 (0.12-0.66) |                    |
| Model excluding iCHD     |                  | 0.030              |
| Poor Health              | 1.00 (Referent)  |                    |
| Intermediate Health      | 0.83 (0.52-1.33) |                    |
| Ideal Health             | 0.39 (0.17-0.91) |                    |

iCHD = Incident coronary heart disease

**Table S4.** Unadjusted and adjusted hazard ratio of incident heart failure hospitalization across physical activity levels with full model excluding participants with incident coronary heart disease, COPD, or atrial fibrillation.

| Models                              | HR (95% CI)      | P <sub>trend</sub> |
|-------------------------------------|------------------|--------------------|
| Model excluding iCHD                |                  | 0.030              |
| Poor Health                         | 1.00 (Referent)  |                    |
| Intermediate Health                 | 0.83 (0.52-1.33) |                    |
| Ideal Health                        | 0.39 (0.17-0.91) |                    |
| Model excluding COPD                |                  | 0.014              |
| Poor Health                         | 1.00 (Referent)  |                    |
| Intermediate Health                 | 0.91 (0.60-1.39) |                    |
| Ideal Health                        | 0.35 (0.15-0.80) |                    |
| Model excluding atrial fibrillation |                  | 0.002              |
| Poor Health                         | 1.00 (Referent)  |                    |
| Intermediate Health                 | 0.83 (0.56-1.23) |                    |
| Ideal Health                        | 0.24 (0.10-0.60) |                    |

iCHD = incident coronary heart disease

COPD = chronic obstructive pulmonary disease
